# Supplementary material for: Simple models of quantitative firing phenotypes in hippocampal neurons: Comprehensive coverage of intrinsic diversity
Source: PubMed Central journal article supplement (PMC6837624; doi:10.1371/journal.pcbi.1007462), 2019-10-28

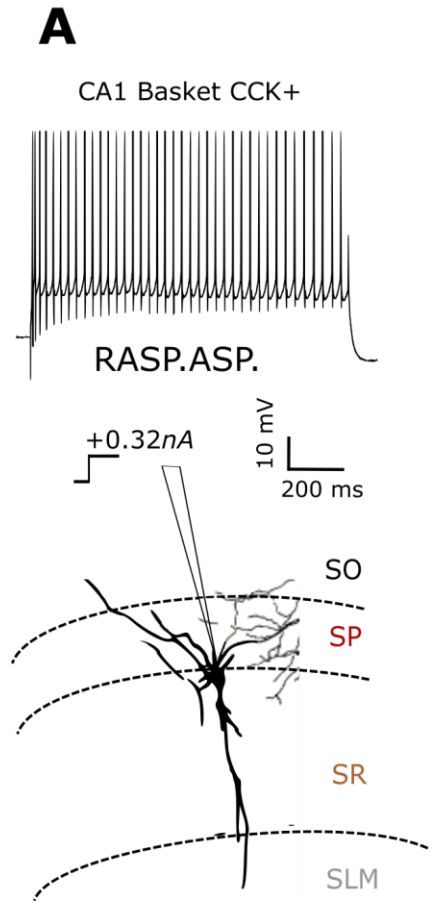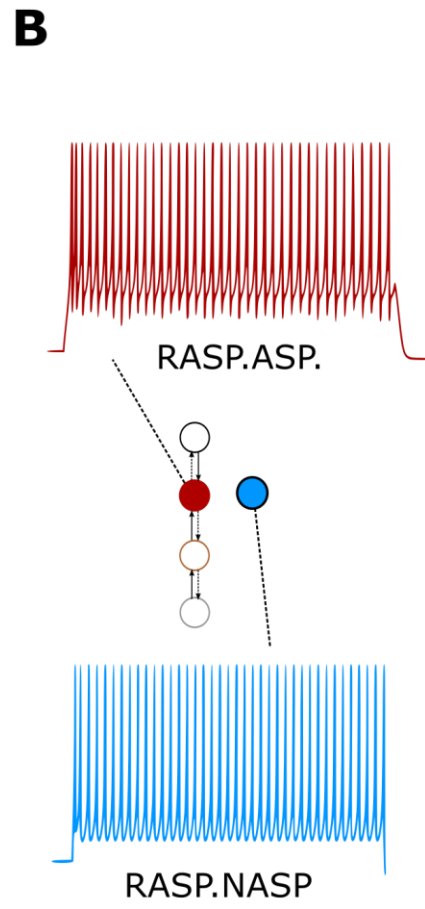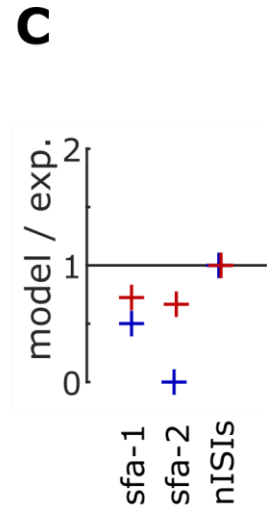

Supplement: pcbi.1007462.s005.pdf [file pcbi.1007462.s005.pdf]
