# Supplementary material for: Simple models of quantitative firing phenotypes in hippocampal neurons: Comprehensive coverage of intrinsic diversity
Source: PubMed Central journal article supplement (PMC6837624; doi:10.1371/journal.pcbi.1007462), 2019-10-28
Supplement: pcbi.1007462.s007.pdf [file pcbi.1007462.s007.pdf]

*high Rin*  
*ASP.NASP*

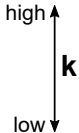

*PSTUT*

*SOM+*  
*PV+*

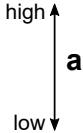

*narrow spikes*

*5HT-3+*  
*low Vrest*

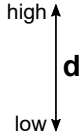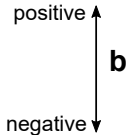

*wide spikes*
