# Supplementary material for: Simple models of quantitative firing phenotypes in hippocampal neurons: Comprehensive coverage of intrinsic diversity
Source: PubMed Central journal article supplement (PMC6837624; doi:10.1371/journal.pcbi.1007462), 2019-10-28
Supplement: pcbi.1007462.s008.pdf [file pcbi.1007462.s008.pdf]

**S1A Table.** Quantitative features of firing patterns

|                 |                            |
|-----------------|----------------------------|
| <i>fsl</i>      | First Spike Latency        |
| <i>sfa</i>      | Spike Frequency Adaptation |
| <i>ISI</i>      | Inter-Spike Interval       |
| <i>nISIs</i>    | number of ISIs             |
| <i>pss</i>      | Post-Spike Silence         |
| <i>n_bursts</i> | Number of bursts           |
| <i>bw</i>       | Burst Width                |
| <i>pbi</i>      | Post-Burst Interval        |
| <i>b-nISIs</i>  | nISIs within a Burst       |

**S1B Table.** Elements of firing patterns

|       |                               |
|-------|-------------------------------|
| D     | Delayed                       |
| ASP   | Adapting SPiking              |
| NASP  | Non-Adapting SPiking          |
| RASP  | Rapidly Adapting SPiking      |
| TSTUT | Transient Stuttering          |
| TSWB  | Transient Slow Wave Bursting  |
| PSTUT | Persistent Stuttering         |
| PSWB  | Persistent Slow Wave Bursting |
| SLN   | SiLeNce                       |
| RBS   | ReBoundSpiking                |

**S1C Table.** Other abbreviations

|            |                                                  |
|------------|--------------------------------------------------|
| IM         | Izhikevich Model                                 |
| compact-MC | Compact Multi-Compartment model                  |
| morpho-MC  | Morphologically detailed Multi-Compartment model |
| EA         | Evolutionary Algorithm                           |
| SP         | Stratum Pyramidale                               |
| SR         | Stratum Radiatum                                 |
| SLM        | Stratum Lacunosum Moleculare                     |
| SO         | Stratum Oriens                                   |
| SG         | Stratum Granulosum                               |
| SMi        | Inner one-third of Stratum Moleculare            |
| SMo        | Outer one-third of Stratum Moleculare            |
| H          | Hilus                                            |
