# Supplementary material for: Simple models of quantitative firing phenotypes in hippocampal neurons: Comprehensive coverage of intrinsic diversity
Source: PubMed Central journal article supplement (PMC6837624; doi:10.1371/journal.pcbi.1007462), 2019-10-28
Supplement: pcbi.1007462.s009.pdf [file pcbi.1007462.s009.pdf]

**S2 Table.** Features and errors for all the traces from Fig 1

| Neuron type                     | pattern class | <i>I</i> (pA)<br>exp, model | <i>fsl</i> (ms)<br>exp, model,<br>model/exp | <i>sfa</i><br>exp, model,<br>model/exp                | <i>nISIs</i><br>exp,<br>model,<br>model/exp | <i>pss</i> (ms)<br>exp, model,<br>model/exp |
|---------------------------------|---------------|-----------------------------|---------------------------------------------|-------------------------------------------------------|---------------------------------------------|---------------------------------------------|
| DG Total Molecular Layer        | -             | 50, 42                      | 150, 367, <b>2.45</b>                       | -                                                     | 1, 1, <b>1*</b>                             | -                                           |
|                                 | ASP.          | 75, 73                      | 64.71, 96, <b>1.49</b>                      | $y=0.142x+0.947,$<br>$y=0.142x+0.975,$<br><b>1.01</b> | 5, 5, <b>1</b>                              | 99.06, 96.96,<br><b>0.98</b>                |
|                                 | ASP.          | 100, 102                    | 22.25, 64, <b>2.88</b>                      | $y=0.114x+0.911,$<br>$y=0.082x+0.987,$<br><b>0.90</b> | 9, 9, <b>1</b>                              | 52.97, 27.37,<br><b>0.52</b>                |
|                                 | ASP.          | 200, 205                    | 13.05, 33, <b>2.53</b>                      | $y=0.056x+1.073,$<br>$y=0.032x+1.014,$<br><b>0.76</b> | 19, 19, <b>1</b>                            | 18.67, 17.40,<br><b>0.93</b>                |
| CA1 Basket                      | NASP          | 150, 151                    | 175.00, 141, <b>0.81</b>                    | $y=0.000x+1.197,$<br>$y=0.000x+1.197,$<br><b>1</b>    | 2, 2, <b>1</b>                              | 210, 210.15, <b>1</b>                       |
|                                 | NASP          | 310, 316                    | 4.97, 18.00, <b>3.62</b>                    | $y=0.000x+2.080,$<br>$y=0.000x+1.165,$<br><b>0.56</b> | 55, 55, <b>1</b>                            | 20.90, 0, <b>0</b>                          |
| CA1 Trilaminar                  | RBS           | -100, -100                  | 770, 810, <b>1.05</b>                       | -                                                     | 1, 1, <b>1</b>                              | -                                           |
|                                 | ASP.SLN       | 25, 23                      | 50.73, 56.00, <b>1.1</b>                    | $y=0.720x+1.000,$<br>$y=0.491x+1.000,$<br><b>0.84</b> | 2, 2, <b>1</b>                              | 541.95, 542.17, <b>1</b>                    |
|                                 | ASP.          | 50, 46                      | 14.49, 28, <b>1.93</b>                      | $y=0.038x+1.340,$<br>$y=0.036x+1.006,$<br><b>0.85</b> | 21, 21, <b>1</b>                            | 26.21, 24.59,<br><b>0.94</b>                |
| MEC LV-VI Pyramidal Polymorphic | D.NASP        | unknown,<br>78              | 292.34, 292, <b>1</b>                       | $y=0.000x+1.055,$<br>$y=0.000x+1.042,$<br><b>0.99</b> | 5, 5, <b>1</b>                              | 40.00, 63.57,<br><b>1.59</b>                |
|                                 | ASP.          | 200, 197                    | 56.40, 56.00, <b>0.99</b>                   | $y=0.036x+1.103,$<br>$y=0.030x+1.024,$<br><b>0.88</b> | 18, 18, <b>1</b>                            | 23.70, 23.33,<br><b>0.98</b>                |

\*number of spikes is compared for single-spike traces
