# Supplementary material for: Simple models of quantitative firing phenotypes in hippocampal neurons: Comprehensive coverage of intrinsic diversity
Source: PubMed Central journal article supplement (PMC6837624; doi:10.1371/journal.pcbi.1007462), 2019-10-28
Supplement: pcbi.1007462.s010.pdf [file pcbi.1007462.s010.pdf]

**S3A Table.** Features and errors for all the traces from Fig 2 (spiking features)

| Neuron type              | pattern class | $I$ (pA)<br>exp, model | $fsl$ (ms)<br>exp, model,<br>model/exp | $sfa$<br>exp, model,<br>model/exp                     | $nISIs$<br>exp, model,<br>model/exp | $pss$ (ms)<br>exp, model,<br>model/exp |
|--------------------------|---------------|------------------------|----------------------------------------|-------------------------------------------------------|-------------------------------------|----------------------------------------|
| CA1 Bistratified         | PSTUT         | 400, 408               | 40.48,<br>37.00,<br><b>0.91</b>        | NA                                                    | NA                                  | 43.48, 43.75,<br><b>1.01</b>           |
|                          | ASP.          | 600, 602               | 12.38,<br>16.00,<br><b>1.29</b>        | $y=0.008x+1.213,$<br>$y=0.005x+1.187,$<br><b>0.8</b>  | 35, 35, <b>1</b>                    | 9.63, 0, <b>0</b>                      |
| EC LV Deep Pyramidal     | TSTUT.NASP    | 400, 410               | 16.00,<br>15.00,<br><b>0.94</b>        | NA                                                    | NA                                  | 164, 126,<br><b>0.77</b>               |
| DG Granule               | TSWB.SLN      | 200, 208               | 41.81,<br>13.00,<br><b>0.31</b>        | NA                                                    | 1, 1, <b>1</b>                      | 1904.27,<br>1902.08,<br><b>1.0</b>     |
|                          | TSWB.SLN      | 400, 404               | 7.79, 7.00,<br><b>0.9</b>              | NA                                                    | 3, 4, <b>1.33</b>                   | 1943.55,<br>1943.16,<br><b>1.0</b>     |
| DG Hilar Ectopic Granule | TSWB.SLN      | unknown,<br>602        | 14.34,<br>17.00,<br><b>1.19</b>        | NA                                                    | 1, 1, <b>1</b>                      | 156.16, 129.95,<br><b>0.83</b>         |
|                          | ASP.          | 700, 699               | 9.52, 10,<br><b>1.05</b>               | $y=0.791x+0.693,$<br>$y=0.790x+0.683,$<br><b>0.99</b> | 2, 2, <b>1</b>                      | 107.94, 109.29,<br><b>1.01</b>         |

**S3B Table.** Features and errors for all the traces from Fig 2 (bursting/stuttering features)

| Neuron type          | pattern class | $I$ (pA)<br>exp, model | $n\_bursts$<br>exp, model,<br>model/exp | $bw^*$ (ms)<br>exp, model,<br>model/exp | $pbi^*$ (ms)<br>exp, model,<br>model/exp | $b-nISIs^*$<br>exp, model,<br>model/exp |
|----------------------|---------------|------------------------|-----------------------------------------|-----------------------------------------|------------------------------------------|-----------------------------------------|
| CA1 Bistratified     | PSTUT         | 400, 408               | 2, 2, <b>1</b>                          | 83, 70<br>56, 69,<br><b>1.04</b>        | 154, 154, <b>1</b>                       | 3, 3,<br>2, 2,<br><b>1</b>              |
| EC LV Deep Pyramidal | TSTUT.NASP    | 400, 410               | 2, 2, <b>1</b>                          | 88, 38<br>3752, 3654,<br><b>0.7</b>     | 276, 365, <b>1.32</b>                    | 2, 2,<br>16, 19,<br><b>1.09</b>         |

\*features are reported for each burst in a pattern
