# Supplementary material for: Simple models of quantitative firing phenotypes in hippocampal neurons: Comprehensive coverage of intrinsic diversity
Source: PubMed Central journal article supplement (PMC6837624; doi:10.1371/journal.pcbi.1007462), 2019-10-28
Supplement: pcbi.1007462.s011.pdf [file pcbi.1007462.s011.pdf]

**S4A Table.** Features and errors for all the traces from fig 3 (spiking features)

| Neuron type                   | pattern class | $I$ (pA)<br>exp,<br>model | $fsl$ (ms)<br>exp,<br>model,<br>model/exp | $sfa$<br>exp, model,<br>model/exp                                                                       | $nISIs$<br>exp,<br>model,<br>model/exp | $pss$ (ms)<br>exp, model,<br>model/exp |
|-------------------------------|---------------|---------------------------|-------------------------------------------|---------------------------------------------------------------------------------------------------------|----------------------------------------|----------------------------------------|
| CA1 Perforant Path Associated | ASP.SLN       | 700, 708                  | 0.16, 12,<br><b>75</b>                    | $y=0.142x+0.915,$<br>$y=0.115x+0.852,$<br><b>0.875</b>                                                  | 12, 12, <b>1</b>                       | 59.55, 59.10,<br><b>0.99</b>           |
| DG MOLAX                      | PSTUT         | 400, 397                  | 15.30, 43,<br><b>2.81</b>                 | NA                                                                                                      | NA                                     | 56.90, 0, <b>0</b>                     |
| MEC LIII Multipolar           | RBS           | -200, 193                 | 625, 625,<br><b>1</b>                     | NA                                                                                                      | 1, 1, <b>1</b>                         | NA                                     |
|                               | NASP          | 250, 243                  | 4.05, 8,<br><b>1.98</b>                   | $y=0.000x+1.310,$<br>$y=0.000x+1.401,$<br><b>1.06</b>                                                   | 53, 53, <b>1</b>                       | 7.37, 0, <b>0</b>                      |
| DG AIPRIM                     | ASP.NASP      | 200, 209                  | 0.45, 14,<br><b>31.11</b>                 | $y1=0.031x1+1.268,$<br>$y1=0.040x1+1.011;$<br>$y2=0.000x2+3.576,$<br>$y2=0.000x2+3.567,$<br><b>1.02</b> | 33, 33, <b>1;</b><br>24, 24, <b>1</b>  | 1.24, 13.26,<br><b>10.7</b>            |
| CA1 Pyramidal                 | ASP.          | 150, 154                  | 29.16, 89,<br><b>3.05</b>                 | $y=0.085x+1.140,$<br>$y=0.078x+1.137,$<br><b>0.96</b>                                                   | 11, 11, <b>1</b>                       | 120.79,<br>72.12,<br><b>0.6</b>        |

**S4B Table.** Features and errors for all the traces from fig 3 (bursting/stuttering features)

| Neuron type | pattern class | $I$ (pA)<br>exp,<br>model | $n\_bursts$<br>exp,<br>model,<br>model/exp | $bw^*$ (ms)<br>exp, model,<br>model/exp | $pbi^*$ (ms)<br>exp,<br>model,<br>model/exp | $b-nISIs^*$<br>exp, model,<br>model/exp |
|-------------|---------------|---------------------------|--------------------------------------------|-----------------------------------------|---------------------------------------------|-----------------------------------------|
| DG MOLAX    | PSTUT         | 400, 397                  | 7, 6, <b>0.86</b>                          | 39.90, 45;                              | 34, 67;                                     | 4, 3;                                   |
|             |               |                           |                                            | 0, 39;                                  | 39.2, 95;                                   | 1, 2;                                   |
|             |               |                           |                                            | 47.8, 28;                               | 66, 65;                                     | 3, 2;                                   |
|             |               |                           |                                            | 0, 38;                                  | 62.8, 88;                                   | 1, 2;                                   |
|             |               |                           |                                            | 23.4, 29;                               | 64.9, 72;                                   | 2, 2;                                   |
|             |               |                           |                                            | 24.5, 0,                                | 74.4, 0,                                    | 2, 1,                                   |
| <b>0.49</b> | <b>1.32</b>   | <b>1.15</b>               |                                            |                                         |                                             |                                         |

\*features are reported for each burst in a pattern
